# Supplementary material for: Influence of LVAD function on mechanical unloading and electromechanical delay: a simulation study
Source: Med Biol Eng Comput. 2017 Nov 3;56(5):911–21. doi: 10.1007/s11517-017-1730-y (PMC5906510; doi:10.1007/s11517-017-1730-y)
Supplement: Supplementary file 1 — (DOC 19.4 KB) [file 11517_2017_1730_MOESM1_ESM.docx]

**Supplementary Material**

**Mathematical equation for the electrophysiological model**

To simulate the cardio-electrophysiological behavior, we used a mathematical model of the human ventricle based on the study by ten Tusscher et al. [22].

The ionic movement across the cell membrane of the myocardium through the ionic channels can be expressed by the following electrical circuit model:

(1)

where *V* (mV) is voltage difference, *t* (ms) is time, *Iion* is major ionic currents, *Istim* is stimulus current, and *Cm* is capacitance per unit of surface area. Equation (1) represents the electrophysiology of a single cell with stimulus current. *Iion* consists of the major ionic currents such as sodium (Na+), potassium (K+), and calcium (Ca2+) as follows:

(2)

To simulate the electrophysiological propagation in a three-dimensional ventricular model, the Eq. (1) of the single-cell can be expanded by the following partial differential equation (PDE):

(3)

where *ρ* is cellular resistivity and *S* is surface to volume ratio in *x*, *y*, and *z* directions.

The equations of the currents that comprise *Iion* are as follows:

Fast sodium current

(4)

Inward rectifier potassium current

(5)

Transient outward current

(6)

Rapid delay rectifier current

(7)

Slow delay rectifier current

(8)

L-type calcium current

(9)

Sodium/calcium exchange current

(10)

Pump current of sodium/potassium, calcium, and potassium

(11)

(12)

(13)

Background currents

(14)

(15)

Calcium dynamics

(16)

(17)

(18)

(19)

(20)

(21)

(22)

The calcium dynamic is used as input to the mechanical compartment. For a better description of the equation, please see the paper by ten Tusscher et al. [22].

**Mathematical equation for the myofilament or mechanical model**

In this study, we used the cardio myofilament model proposed by Rice et al. [20]. Generally, they used ordinary differential equations (ODEs) to simulate the change in sarcomere length (*SL*). For the isometric contraction, *dSL*/*dt* = 0, and *SL* is assumed to remain in the original state, *SL*0. For the isotonic contraction, the following equation is used to calculate *SL*:

(23)

(24)

(25)

where KSE is the stiffness in normalized units of F/mm and x is the sarcomere length.

**Mathematical equation for the lumped model**

The lumped model in this study follows the model by Kerckhoffs et al. [15], which is shown on the right side in Fig. 1. The equations of the components are shown as follows:

(26)

(27)

(28)

(29)

(30)

(31)

(32)

(33)

where *R* is resistance, *Q* is flux, *V* is volume, *C* is compliacne, *SA* is systemic artery, *SV* is systemic vein, *RA* is right atrium, *RV* is right ventricle, *PA* is pulmonary artery, *PV* is pulmonary vein, *LA* is left atrium, and *LV* is left ventricle. The subscript symbols represent each compartment of the circulatory.
